# Supplementary material
Source: publisher figshare collection journal article supplement (https://acs.figshare.com/ndownloader/files/14072255)

## **Supporting Information**

### **Understanding the Magnetic Memory Effect in Fe-Doped NiO Nanoparticles for the Development of Spintronic Devices**

Ashish Chhaganlal Gandhi,<sup>†</sup> R. Pradeep,<sup>‡</sup> Yu-Chen Yeh,<sup>†</sup> Tai-Yue Li,<sup>†</sup> Chi-Yuan Wang,<sup>†</sup> Y.  
Hayakawa,<sup>‡</sup> and Sheng Yun Wu<sup>†,\*</sup>

<sup>†</sup>Department of Physics, National Dong Hwa University, Hualien 97401, Taiwan

<sup>‡</sup>Research Institute of Electronics, Shizuoka University, Hamamatsu 432-8011, Japan

\*Corresponding author: [sywu@mail.ndhu.edu.tw](mailto:sywu@mail.ndhu.edu.tw) (SYW)

**Figure S1** (a)-(c) SEM images of 1, 5, and 10 % samples taken at the same magnification. (d) Histogram of mean diameter distribution of NiO and 1, 5, and 10 % samples obtained from SEM images (bottom to top). (d)-(g) The mean diameter  $\langle d \rangle$  of the NPs was estimated by fitting the log-normal distribution function:  $f(d) = \frac{1}{\sqrt{2\pi}d\sigma} \exp \left[ -\frac{(\ln d - \ln \langle d \rangle)^2}{2\sigma^2} \right]$  to the histogram obtained from the SEM images. The solid red lines in (d)-(g) represent the log-normal distribution fit. The width of hexagonal NPs observed from SEM images is around  $\sim 10$  to  $30$  nm.

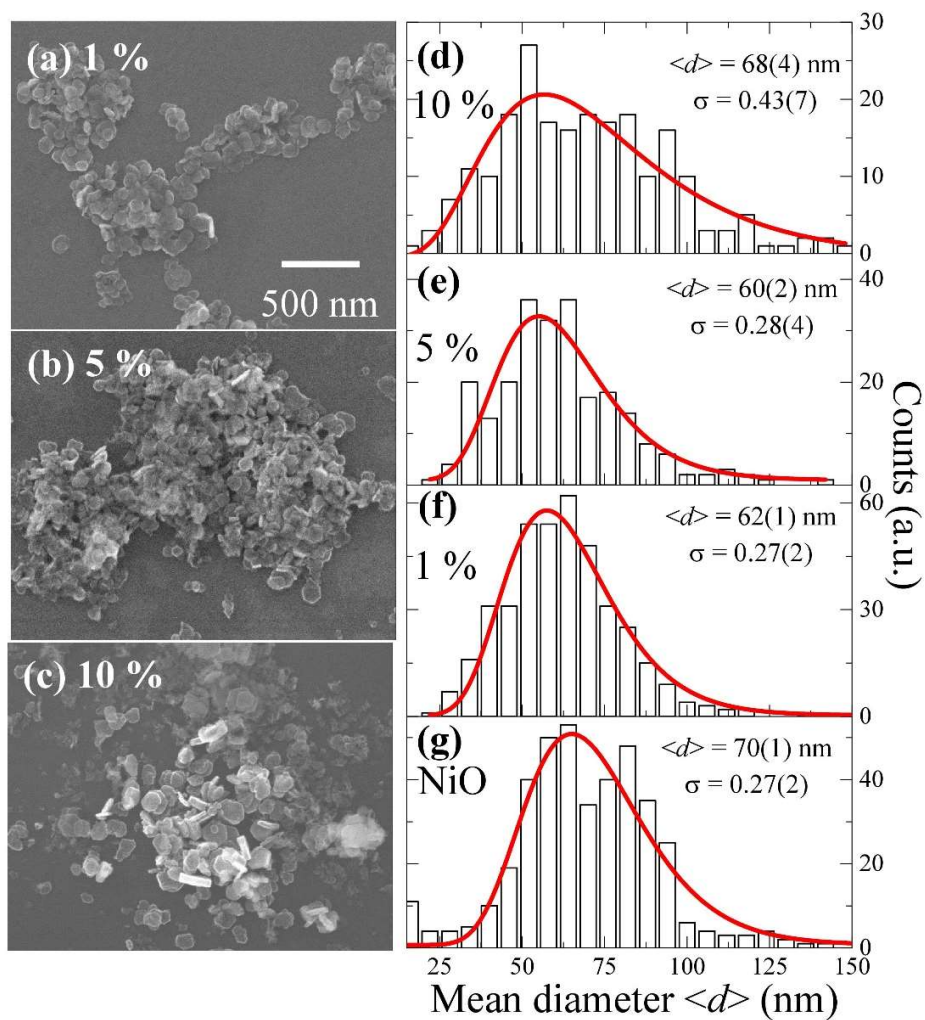

**Figure S2** (a)-(c) TEM images, (d)-(f) HRTEM images and (g)-(i) SAED patterns of NiO, 5 and 10 % samples, respectively. The right-hand side of (g)-(i) shows the simulated SAED ring pattern.

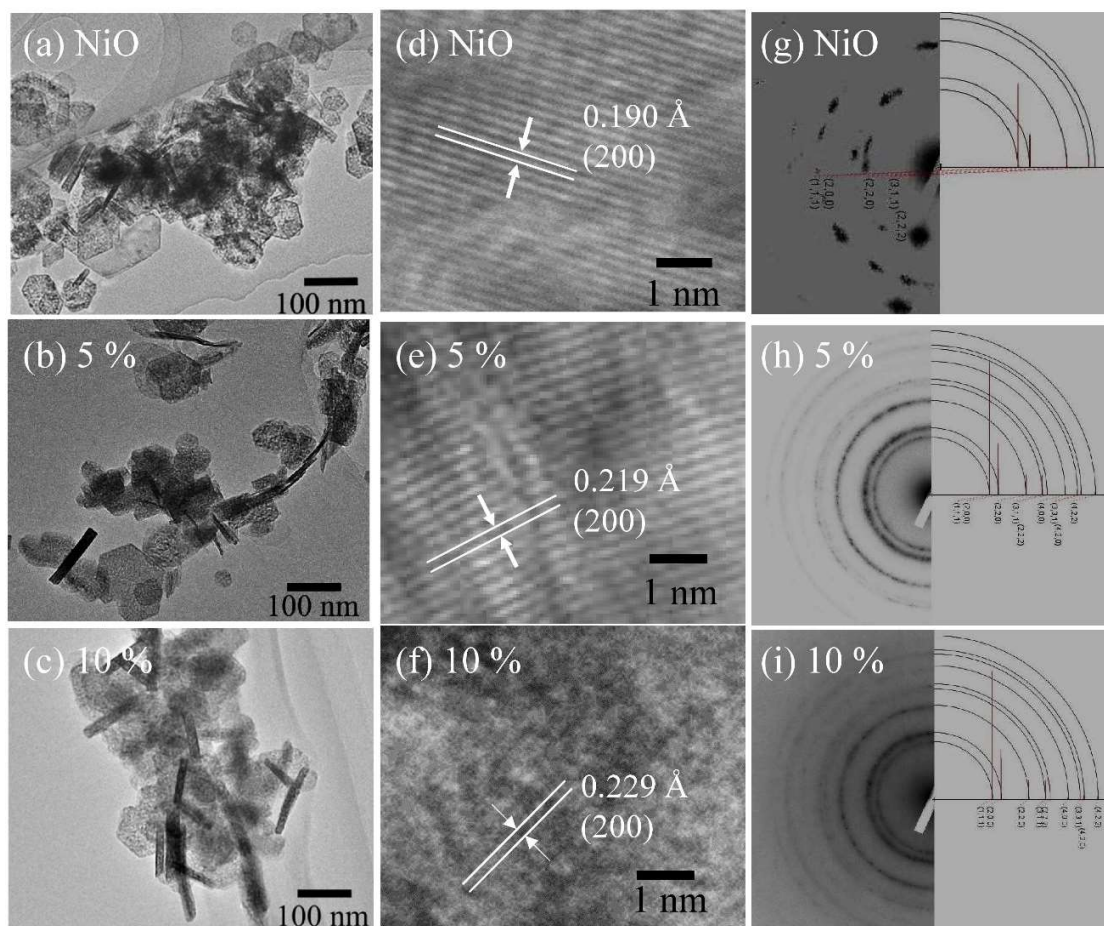

**Figure S3** Intensity Resolution Function (IRF) displays the scattering angle dependence of FWHM for various Fe-doped concentration in NiO nanoparticles.

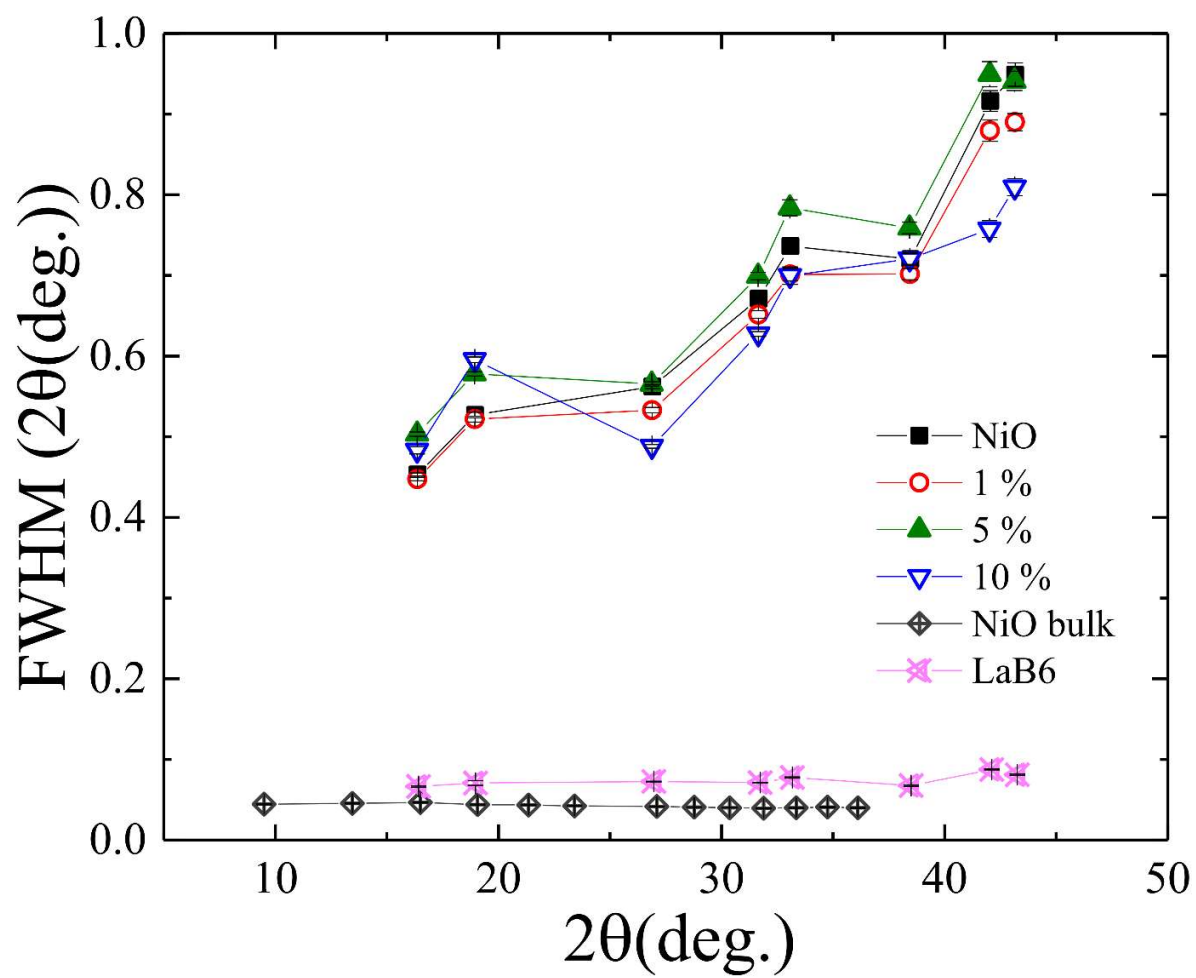

**Figure S4** (a)-(b) Frequency dependence of AC susceptibility  $\chi'(T)$  measurements from 5 and 10 % samples. (c)  $T_v$  vs.  $\ln(\nu)$  for 5 and 10 % samples described with a slop of 2.74 and 2.79, respectively. The peak position shifts towards higher temperatures and the height of the peak decrease with increasing  $\nu$ , consistent with a glassy transition with freezing temperature  $T_v$ .

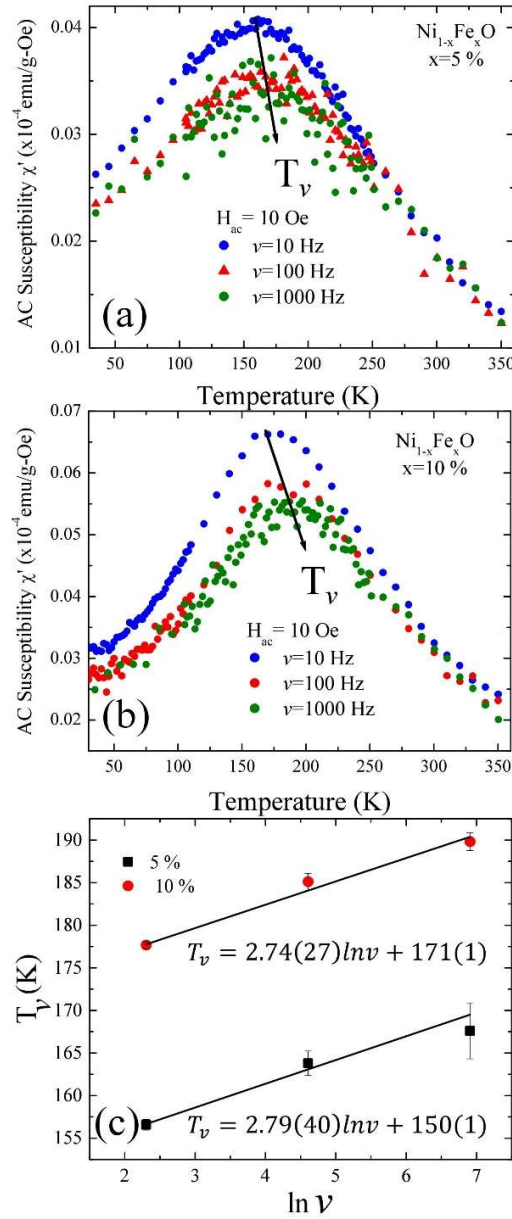

**Figure S5** (a)-(d) ZFC  $M(H_a)$  loops measured at a different temperature from 0, 1, 5 and 10 % samples. (e) Temperature dependency of obtained values of  $H_C$ .

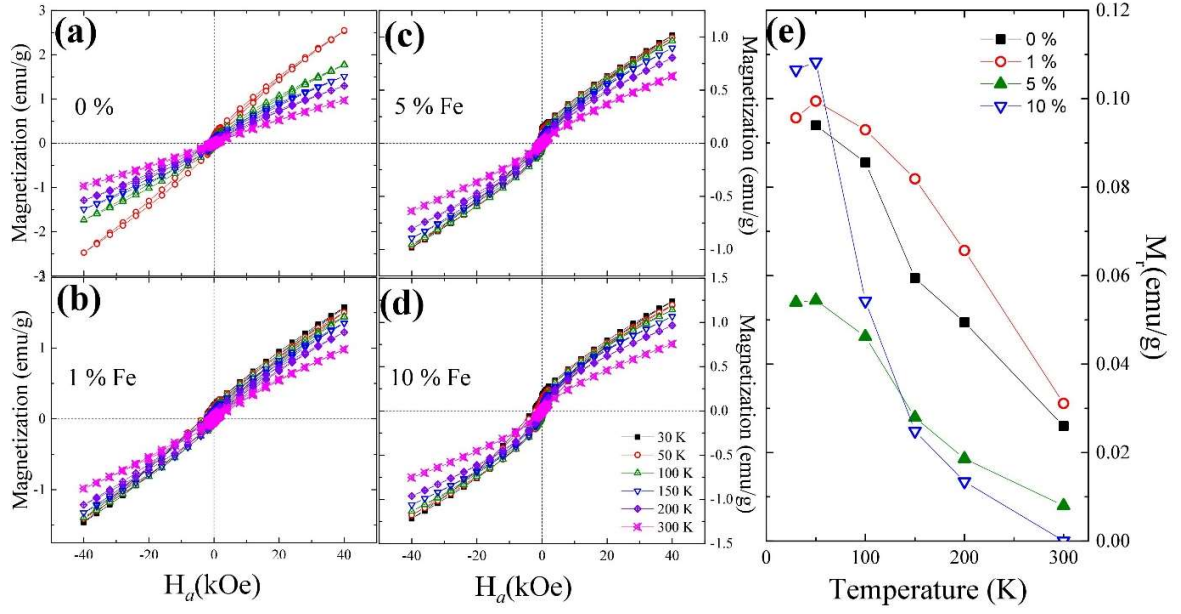

**Figure S6** (a)-(d) FC  $M(H_a)$  loops measured with different cooling field  $H_a$  from 0, 1, 5 and 10 % samples, where inset of the respective figure shows the magnified FC  $M(H_a)$  loops in low-field region. (e) FC cooling field  $H_a$  dependency of  $M_r$ .

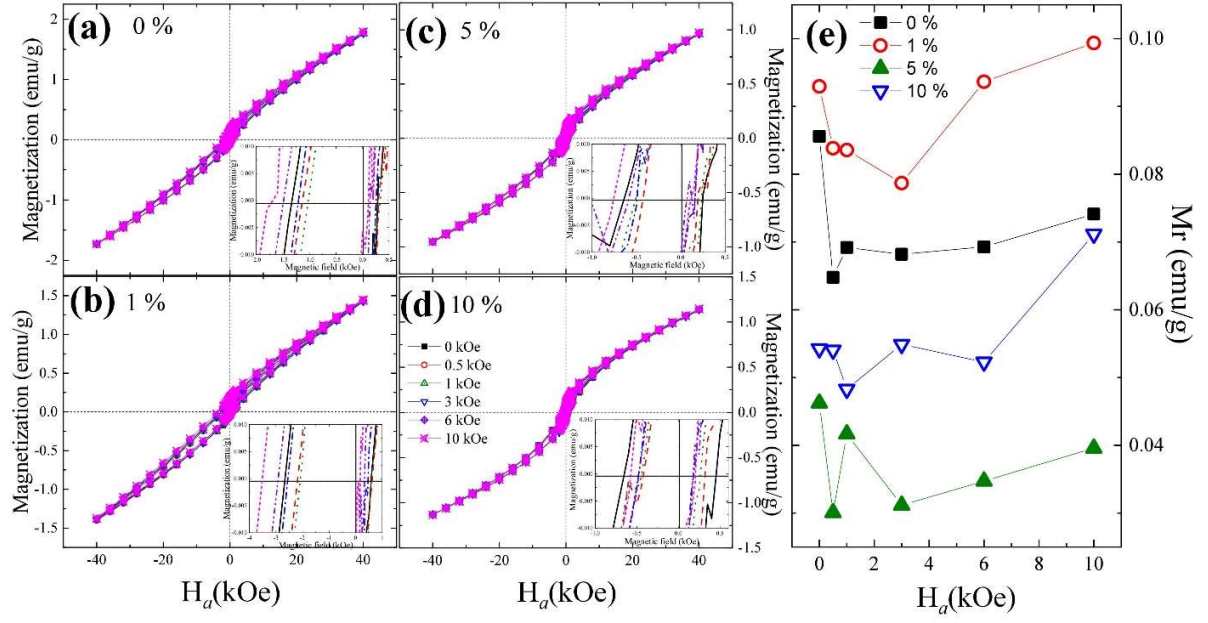

Supplement: Supplementary file 1 [file 14072255]
